# Supplementary material for: Gender-Specific Differences in Self-Care, Treatment-Related Symptoms, and Quality of Life in Hemodialysis Patients
Source: Int J Environ Res Public Health. 2021 Dec 10;18(24):13022. doi: 10.3390/ijerph182413022 (PMC8701918; doi:10.3390/ijerph182413022)
Supplement: Supplementary file 1 [file ijerph-18-13022-s001.zip › SupplementaryMaterial_S2_ReliabilityAnalysis.pdf]

## Supplementary Material - S2

### Results of the reliability analysis of the Dialysis Symptoms Index (DSI), Spanish language translation (N = 102 patients)

**Cronbach's Alpha Based on Standardized Items = 0.889**

TOTAL (30 items)

| Mean  | Variance | Standard deviation | Number of items |
|-------|----------|--------------------|-----------------|
| 48.38 | 225.96   | 15.03              | 30              |

#### Hotelling's T-Squared Test

| Hotelling's T-Squared value | F    | df1 | df2 | p-value |
|-----------------------------|------|-----|-----|---------|
| 219.70                      | 5.48 | 29  | 73  | <0.001  |

F: F-test statistic; df: degrees of freedom

| Total intra-class correlation |             |             |                            |         |
|-------------------------------|-------------|-------------|----------------------------|---------|
| Intra-class correlation       | Lower Bound | Upper Bound | F Test with True Value = 0 | p-value |
| 0.896                         | 0.865       | 0.923       | 9.65                       | <0.001  |
